# Supplementary material
Source: publisher site journal article supplement (https://www.dovepress.com/article/426277)
Supplement: Supplementary file 1 [file get_supplementary_file.php]

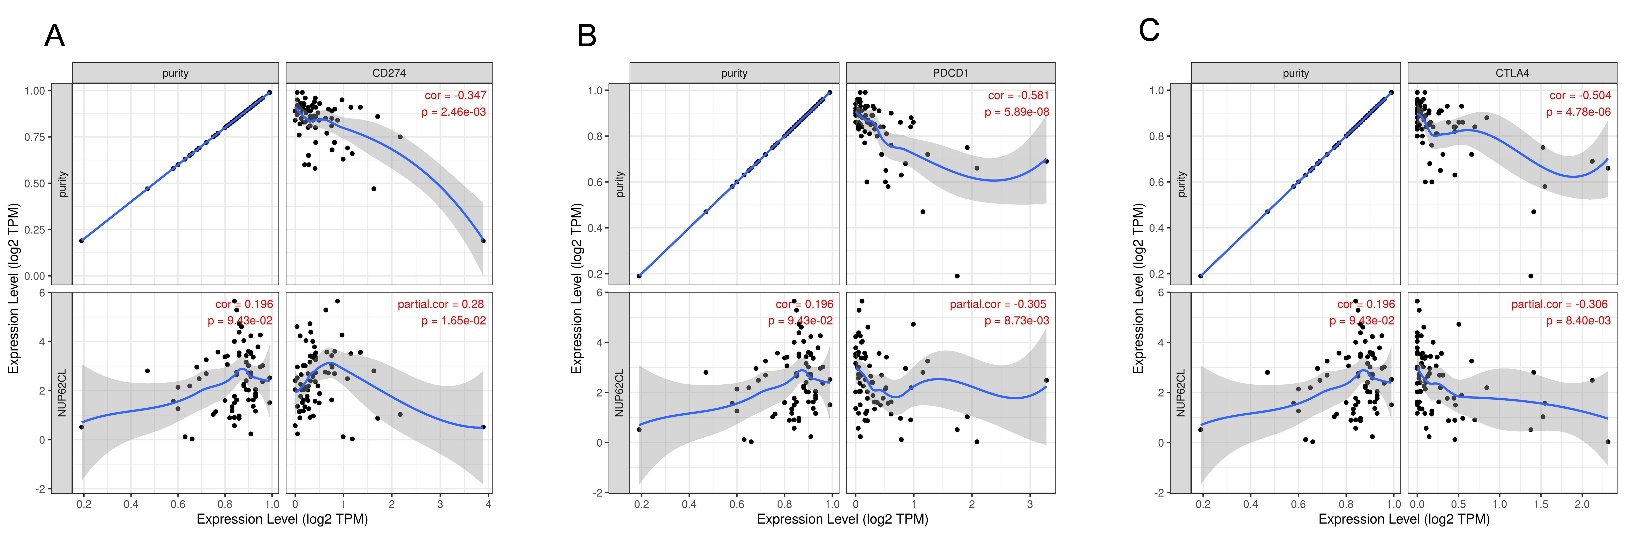
**Figure S1.** The correlation of NUP62CL mRNA expression with PD-L1 (CD274) **(A)**, PD-1, (PDCD1) **(B)** and CTLA-4 (CTLA4) **(C)** mRNA expression after adjusting by tumor purity in TIMER 2.0 database.
